# Supplementary material
Source: ML conference proceedings conference paper supplement (https://openaccess.thecvf.com/content/CVPR2022/html/Suhail_Light_Field_Neural_CVPR_2022_paper.html)
Supplement: Supplementary file 1 [file Suhail_Light_Field_Neural_CVPR_2022_supplemental.pdf]

# Supplementary: Light Field Neural Rendering

Mohammed Suhail<sup>1,2\*</sup> Carlos Esteves<sup>4</sup> Leonid Sigal<sup>1,2,3</sup> Ameesh Makadia<sup>4</sup>

suhail33@cs.ubc.ca machc@google.com lsigal@cs.ubc.ca makadia@google.com

<sup>1</sup>University of British Columbia <sup>2</sup>Vector Institute for AI <sup>3</sup>Canada CIFAR AI Chair <sup>4</sup>Google

## A. Additional implementation details

### A.1. MLP architecture in ablation

We detail the architecture of the ‘1-MLP’ model introduced in Section 4.3. We present the detailed architecture in Tab. A.1. We use a series of DenseGeneral (DG) layers and a final Dense available in Flax [3]. The architecture was determined by running a sweep over various depths. We found that further increase in model capacity leads to poor generalization.

| Layer                       | Input Dimension                  | Output Dimension                 |
|-----------------------------|----------------------------------|----------------------------------|
| DG( $F$ , 256)              | $B \times N \times P \times F$   | $B \times N \times P \times 256$ |
| DG <sub>12</sub> (256, 256) | $B \times N \times P \times 256$ | $B \times N \times P \times 256$ |
| DG( $P$ , 1)                | $B \times N \times P \times 256$ | $B \times N \times 256$          |
| DG( $N$ , 1)                | $B \times N \times 256$          | $B \times 256$                   |
| Dense(256, 1)               | $B \times 256$                   | $B \times 3$                     |

Table A.1. **1-MLP Architecture.** We use notations  $B$  for batch size,  $N$  for number of reference views,  $P$  for number of epipolar projection and  $F$  for feature dimension. DG<sub>12</sub> represents 12 layers of DenseGeneral. We also add skip connections at every fourth layer in DG<sub>12</sub>. The final output corresponds to the predicted color.

### A.2. Spherical light field encoding

For 360° scenes, we use the two-sphere light field parametrization [2]. Each ray is represented by two points on the sphere, by the 4D tuple  $(\theta_1, \phi_1, \theta_2, \phi_2)$ . To encode this representation we found advantageous to use the spherical harmonics basis instead of the sinusoidals. For a given ray, we evaluate a number of spherical harmonics at each intersection and concatenate them to obtain its encoding,

$$\tilde{Y}_m^\ell(\theta_1, \phi_1, \theta_2, \phi_2) = [Y_m^\ell(\theta_1, \phi_1) \parallel Y_m^\ell(\theta_2, \phi_2)], \quad (1)$$

where  $Y_m^\ell(\theta, \phi)$  denotes the spherical harmonics of degree  $\ell$  and order  $m$  evaluated at  $(\theta, \phi)$ . In our experiments, we concatenate all the zonal and sectoral harmonics ( $m = 0$  and  $m = \ell$ ) upto a maximum degree of 4.

| Model              | PSNR $\uparrow$ | SSIM $\uparrow$ | LPIPS $\downarrow$ | Avg. $\downarrow$ |
|--------------------|-----------------|-----------------|--------------------|-------------------|
| Ours <sub>PE</sub> | 33.18           | 0.979           | 0.027              | 0.0123            |
| Ours               | 33.85           | 0.981           | 0.024              | 0.0110            |

Table A.2. Light field encoding ablation on Blender dataset.

To demonstrate the efficacy of the spherical harmonics encoding we conduct an ablation on the blender dataset where we replace the spherical encoding with the regular positional encoding in NeRF [5]. We refer to this model as Ours<sub>PE</sub>. We report the average metric on the blender dataset for this ablation in Tab. A.2.

### A.3. Metric computation

To compute the SSIM metric we use the function available in scikit-image package. To compute the LPIPS on forward facing scene (RFF and Shiny), similar to NeX, we use the VGG model<sup>†</sup> from [7]. On the blender scenes, similar to Mip-NeRF, we use the VGG model available in tensorflow hub to compute LPIPS. We use two different implementation on LPIPS to ensure fairness of comparison.

## B. Additional results

### B.1. Real-forward-facing dataset (RFF)

The RFF dataset introduced by Mildenhall et al. [4] consists of 8 forward facing captures with each scene consisting of around 20 to 62 images. We present the scene-wise breakdown of the results in Table B.3. The metrics for NeRF and NeX are the ones reported in NeX [6].

### B.2. Shiny dataset

The Shiny dataset introduced in NeX [6] presents 8 scenes with challenging view dependent effects, captured by forward-facing cameras. We present the scene-wise breakdown of the results in Tab. B.4. The metrics for NeRF and NeX are the ones reported in NeX [6].

<sup>†</sup>We use the library provided by <https://github.com/richzhang/PerceptualSimilarity>.

| Model    | PSNR  |       |       | SSIM  |       |       | LPIPS |       |       |
|----------|-------|-------|-------|-------|-------|-------|-------|-------|-------|
|          | NeRF  | NeX   | Ours  | NeRF  | NeX   | Ours  | NeRF  | NeX   | Ours  |
| Fern     | 25.49 | 25.63 | 24.86 | 0.866 | 0.887 | 0.886 | 0.278 | 0.205 | 0.135 |
| Flower   | 27.54 | 28.90 | 29.82 | 0.906 | 0.933 | 0.939 | 0.212 | 0.150 | 0.107 |
| Fortress | 31.34 | 31.67 | 33.22 | 0.941 | 0.952 | 0.964 | 0.166 | 0.131 | 0.119 |
| Horns    | 28.02 | 28.46 | 29.78 | 0.915 | 0.934 | 0.957 | 0.258 | 0.173 | 0.121 |
| Leaves   | 21.34 | 21.96 | 22.47 | 0.782 | 0.832 | 0.856 | 0.308 | 0.173 | 0.110 |
| Orchids  | 20.67 | 20.42 | 21.05 | 0.755 | 0.765 | 0.807 | 0.312 | 0.242 | 0.173 |
| Room     | 32.25 | 32.32 | 34.54 | 0.972 | 0.975 | 0.987 | 0.196 | 0.161 | 0.104 |
| Trex     | 27.36 | 28.73 | 30.34 | 0.929 | 0.953 | 0.968 | 0.234 | 0.192 | 0.143 |

Table B.3. Scene-wise breakdown of quantitative results on the Real Forward-Facing dataset.

| Model     | PSNR  |       |       | SSIM  |       |       | LPIPS |       |       |
|-----------|-------|-------|-------|-------|-------|-------|-------|-------|-------|
|           | NeRF  | NeX   | Ours  | NeRF  | NeX   | Ours  | NeRF  | NeX   | Ours  |
| CD        | 30.14 | 31.43 | 35.25 | 0.093 | 0.958 | 0.989 | 0.206 | 0.129 | 0.041 |
| Tools     | 27.45 | 28.16 | 26.55 | 0.938 | 0.953 | 0.945 | 0.204 | 0.151 | 0.130 |
| Crest     | 20.30 | 21.23 | 21.73 | 0.670 | 0.757 | 0.797 | 0.315 | 0.162 | 0.079 |
| Seasoning | 27.79 | 28.60 | 28.34 | 0.898 | 0.928 | 0.936 | 0.276 | 0.168 | 0.102 |
| Food      | 23.32 | 23.68 | 22.88 | 0.796 | 0.832 | 0.821 | 0.308 | 0.203 | 0.151 |
| Giants    | 24.86 | 26.00 | 27.06 | 0.844 | 0.898 | 0.928 | 0.270 | 0.147 | 0.065 |
| Lab       | 29.60 | 30.43 | 35.28 | 0.936 | 0.949 | 0.989 | 0.182 | 0.146 | 0.066 |
| Pasta     | 21.23 | 22.07 | 21.63 | 0.789 | 0.844 | 0.855 | 0.311 | 0.211 | 0.096 |

Table B.4. Scene-wise breakdown of quantitative results on the Shiny dataset.

### B.3. Blender dataset

The Blender dataset introduced by Mildenhall et al. [5] consists of 8 scenes each containing  $800 \times 800$  resolution images rendered from viewpoints randomly sampled on a hemisphere around the object. We present the scene-wise breakdown of the results in Tab. B.5. The metrics for NeRF and Mip-NeRF were obtained from Mip-NeRF [1].

## C. Additional experiments and visualizations

### C.1. Plücker coordinates

Our experiments use ray parametrizations specific to the camera configuration of each type of scene. For forward facing scenes, we employ the light slab light field representation, while for  $360^\circ$  scenes we use the two-sphere. In this section, we explore the alternative of using Plücker coordinates, which are generic and can represent any kind of camera configuration. Since our architecture is agnostic to the light field parametrization, we simply replace the input ray representation with the 6D Plücker coordinates to perform this experiment. When using Plücker coordinates, we observe a drop of 0.18 dB PSNR on the RFF dataset as com-

pared to the light slab representation. Similarly, we observe a drop of 0.25 dB PSNR on the Blender dataset when replacing the two-sphere parametrization with Plücker coordinates. This suggests that for particular configurations, the specific (and lower dimensional) ray parametrizations have a slight advantage over a generic parametrization such as Plücker coordinates.

### C.2. Handling view-dependent effects

While our model is built around geometric constraints (such as epipolar geometry), the attention-based modeling provides the capability to downweigh such constraints when not useful, in order to more directly associate a color to ray coordinates (as in the Vanilla-NLF model described in Section 4.3). We speculate that this, together with the convolutional features (which bring some context) explains our superior performance on view-dependent effects.

We run a mini-ablation to investigate this hypothesis. Figure C.1 shows, for the Lab scene from the Shiny dataset, one crop with transparency/refraction and another that is diffuse and contains sharp details. Our model works well on both regions which indicates its flexibility, in contrast

| Model     | PSNR  |          |       | SSIM  |          |       | LPIPS |          |       |
|-----------|-------|----------|-------|-------|----------|-------|-------|----------|-------|
|           | NeRF  | Mip-NeRF | Ours  | NeRF  | Mip-NeRF | Ours  | NeRF  | Mip-NeRF | Ours  |
| Chair     | 34.08 | 35.14    | 35.30 | 0.975 | 0.981    | 0.989 | 0.026 | 0.021    | 0.012 |
| Drums     | 25.03 | 25.48    | 25.83 | 0.925 | 0.932    | 0.955 | 0.071 | 0.065    | 0.045 |
| Ficus     | 30.43 | 33.29    | 33.38 | 0.967 | 0.980    | 0.987 | 0.032 | 0.020    | 0.010 |
| Hotdog    | 36.92 | 37.48    | 38.66 | 0.979 | 0.982    | 0.993 | 0.030 | 0.027    | 0.009 |
| Lego      | 33.28 | 35.7     | 35.76 | 0.968 | 0.978    | 0.989 | 0.031 | 0.021    | 0.010 |
| Materials | 29.91 | 30.71    | 35.10 | 0.953 | 0.959    | 0.990 | 0.047 | 0.040    | 0.011 |
| Mic       | 34.53 | 36.51    | 35.32 | 0.987 | 0.991    | 0.992 | 0.012 | 0.009    | 0.008 |
| Ship      | 29.36 | 30.41    | 30.94 | 0.869 | 0.882    | 0.952 | 0.150 | 0.138    | 0.084 |

Table B.5. Scene-wise breakdown of quantitative results on the Blender dataset.

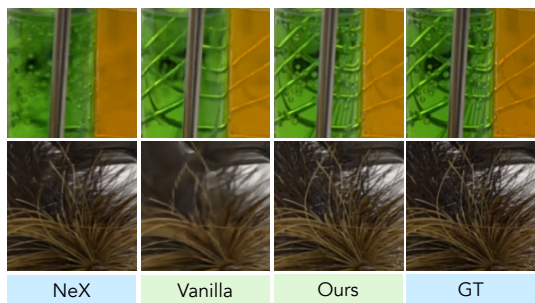

Figure C.1. Crops from two different regions of the *Lab* scene in the Shiny dataset. The Vanilla-NLF model (described in Section 4.3) is able to retrieve a majority of the refraction details but fails to reproduce high frequencies. NeX reproduces sharp details but not the refractions. Our model does well in both regions.

with the baselines.

### C.3. Visualizing view attention

The attention weights  $\beta^j$  (in Eq. 3) correspond to “importance” of each reference view when rendering a target pixel. We visualize these attention weight for a test image in the chair scene from Blender dataset in Fig. C.2. We explain the visualization process in the figure caption.

## References

- [1] J. T. Barron, B. Mildenhall, M. Tancik, P. Hedman, R. Martin-Brualla, and P. P. Srinivasan. Mip-nerf: A multiscale representation for anti-aliasing neural radiance fields. In *Proceedings of the IEEE/CVF International Conference on Computer Vision*, pages 5855–5864, 2021. 2
- [2] E. Camahort, A. Lerios, and D. Fussell. Uniformly sampled light fields. In *Eurographics Workshop on Rendering Techniques*, pages 117–130, 1998. 1
- [3] J. Heek, A. Levskaya, A. Oliver, M. Ritter, B. Rondepierre, A. Steiner, and M. van Zee. Flax: A neural network library

and ecosystem for JAX, 2020. URL <http://github.com/google/flax>. 1

- [4] B. Mildenhall, P. P. Srinivasan, R. Ortiz-Cayon, N. K. Kalantari, R. Ramamoorthi, R. Ng, and A. Kar. Local light field fusion: Practical view synthesis with prescriptive sampling guidelines. *ACM Transactions on Graphics (TOG)*, 38(4):1–14, 2019. 1
- [5] B. Mildenhall, P. P. Srinivasan, M. Tancik, J. T. Barron, R. Ramamoorthi, and R. Ng. Nerf: Representing scenes as neural radiance fields for view synthesis. In *European Conference on Computer Vision (ECCV)*, pages 405–421, 2020. 1, 2
- [6] S. Wizadwongsa, P. Phongthawee, J. Yenphraphai, and S. Suwajanakorn. Nex: Real-time view synthesis with neural basis expansion. In *Proceedings of the IEEE/CVF Conference on Computer Vision and Pattern Recognition (CVPR)*, pages 8534–8543, 2021. 1
- [7] R. Zhang, P. Isola, A. A. Efros, E. Shechtman, and O. Wang. The unreasonable effectiveness of deep features as a perceptual metric. In *Proceedings of the IEEE/CVF Conference on Computer Vision and Pattern Recognition (CVPR)*, 2018. 1

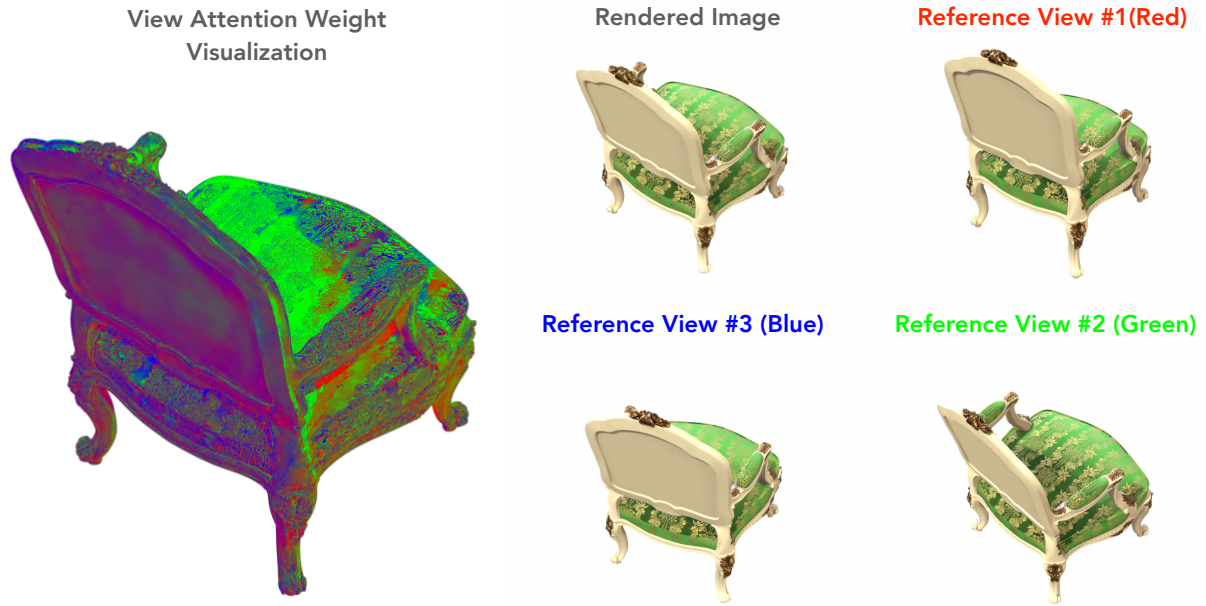

Figure C.2. **View attention weight visualization.** We visualize the attention weights  $\beta^j$  for each rendered pixel for a test image from the chair scene. For each target pixel, we consider three reference views. Thus we have three attention weights  $\beta^1, \beta^2$  and  $\beta^3$  corresponding to reference views 1, 2 and 3 respectively. We treat these attention weights as RGB value and visualize them as an image as shown above. Intuitively, this image shows the contribution of each reference view when rendering a pixel. For example, the cushion is predominantly green as it is most visible in second reference view. Similarly the back of the chair contains almost equal mix of red and blue as it is equally visible in reference views 1 and 3. We do not show the attention weights for the background pixels for clarity of visualization.
